# Supplementary material for: Detection of SO2F2 Using a Photoacoustic Two-Chamber Approach
Source: MDPI journal article supplement (doi:10.3390/s24010191), 2023-12-28
Supplement: s1 [file s1]

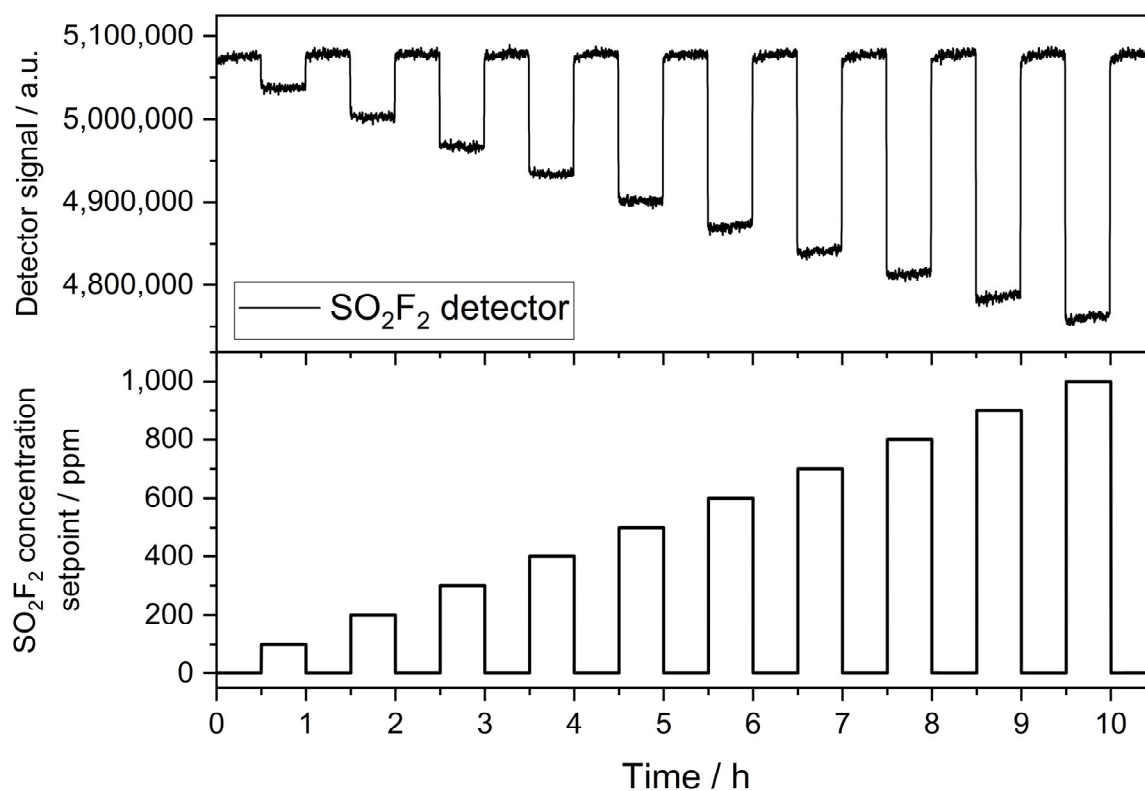

**Figure S1.** Sensor response to  $\text{SO}_2\text{F}_2$  using the 50 mm cell.

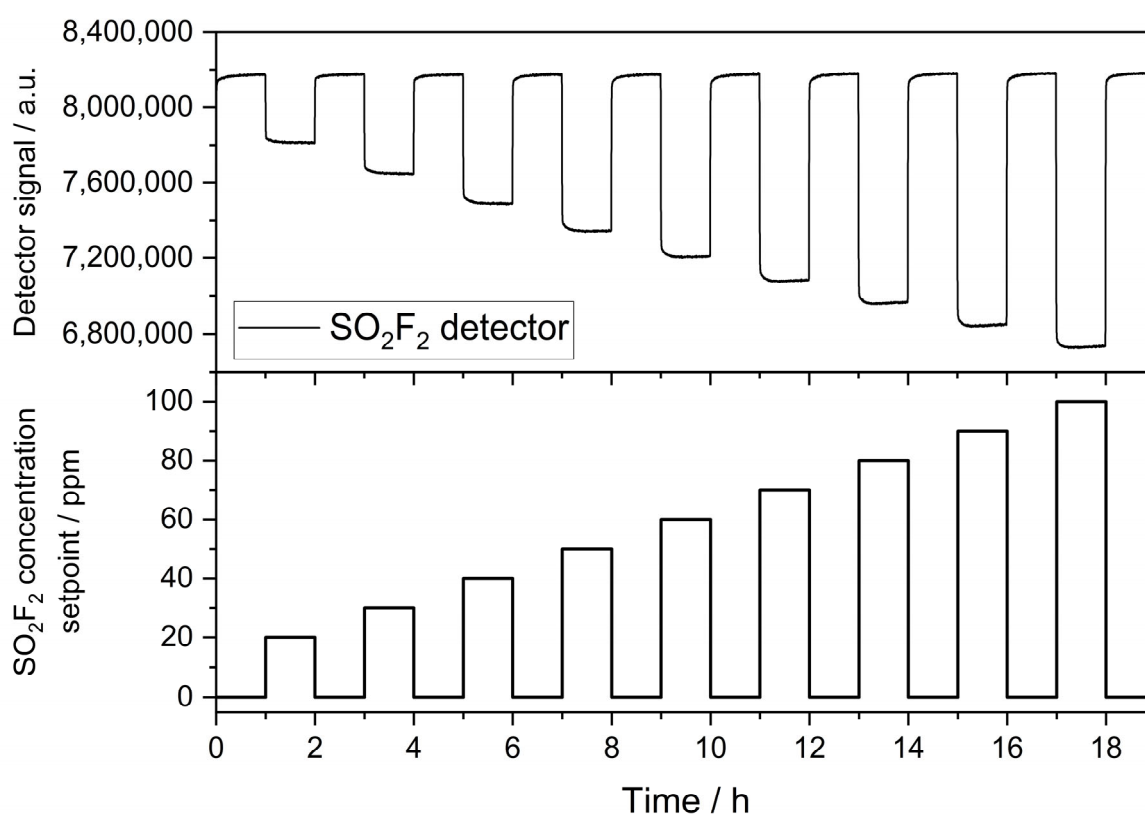

**Figure S2.** Sensor response to  $\text{SO}_2\text{F}_2$  using the 1.6 m cell.
